# Supplementary material for: Modelling the Effectiveness of Tepotinib in Comparison to Standard-of-Care Treatments in Patients with Advanced Non-small Cell Lung Cancer (NSCLC) Harbouring METex14 Skipping in the UK
Source: Springer Nature journal article supplement (doi:10.1007/s11523-024-01038-z), 2024-03-01
Supplement: MOESM1 [file 26868020]

# Supplementary appendix

## Title:

Modelling the effectiveness of tepotinib in comparison to standard-of-care treatments in patients with advanced non-small cell lung cancer (NSCLC) harbouring *MET*ex14 skipping in the United Kingdom

Short title (limit: 100 characters): Modelling effectiveness of tepotinib versus standard of care in patients with *MET*ex14 skipping NSCLC

## Authors:

Rachael Batteson<sup>1</sup>, Emma Hook<sup>1</sup>, Hollie Wheat<sup>1</sup>, Anthony J Hatswell<sup>1,2</sup>, Helene Vioix<sup>3</sup>, Thomas McLean<sup>4</sup>, Stamatia Theodora Alexopoulos<sup>4</sup>, Shobhit Bajjal<sup>5</sup>, Paul K. Paik<sup>6,7</sup>

1: Delta Hat Ltd, Nottingham, UK

2: Department of Statistical Science, UCL, London, UK

3: Global Evidence and Value Department, the healthcare business of Merck KGaA, Darmstadt, Germany

4: Merck Serono Ltd., Feltham, UK, an affiliate of Merck KGaA, Darmstadt, Germany

5: University Hospitals Birmingham NHS Foundation Trust, Birmingham, UK

6: Weill Cornell Medical College, New York, USA

7: Memorial Sloan Kettering Cancer Center, New York, USA

Corresponding author: Rachael Batteson ([rbatteson@deltahat.com](mailto:rbatteson@deltahat.com))

**Table 1: Real-world evidence data comparator mixes**

| Category                        | Treatment                                          | Distribution |
|---------------------------------|----------------------------------------------------|--------------|
| <b>Untreated population</b>     |                                                    |              |
| Immunotherapy                   | Pembrolizumab                                      | 86.8%        |
|                                 | Atezolizumab                                       | 1.6%         |
|                                 | Nivolumab                                          | 3.9%         |
|                                 | Nivolumab/ipilimumab                               | 7.7%         |
| Immunotherapy plus chemotherapy | Pembrolizumab/ pemetrexed/ platinum                | 66.7%        |
|                                 | Atezolizumab/ bevacizumab/ carboplatin/ paclitaxel | 10.5%        |
|                                 | Pembrolizumab/ carboplatin/ paclitaxel             | 22.8%        |
| <b>Previously treated</b>       |                                                    |              |
| Chemotherapy                    | Docetaxel/ platinum                                | 1.6%         |
|                                 | Gemcitabine/ platinum                              | 1.8%         |
|                                 | Paclitaxel/ platinum                               | 11.8%        |
|                                 | Vinorelbine/ platinum                              | 0.0%         |
|                                 | Pemetrexed/ platinum                               | 47.8%        |
|                                 | Docetaxel monotherapy                              | 15.5%        |
|                                 | Docetaxel/ nintedanib                              | 0.9%         |
|                                 | Docetaxel/ gemcitabine                             | 6.1%         |
|                                 | Gemcitabine monotherapy                            | 3.3%         |
|                                 | Vinorelbine monotherapy                            | 0.0%         |
|                                 | Bevacizumab/ carboplatin/ paclitaxel               | 11.2%        |

**Table 2: HRQL model parameters**

| Parameter                         | Value      | Source          |                                                   |                                                     |
|-----------------------------------|------------|-----------------|---------------------------------------------------|-----------------------------------------------------|
| Progression-free utility          | 0.719      | VISION          |                                                   |                                                     |
| Post-progression utility          | 0.647      | VISION          |                                                   |                                                     |
| Adverse event                     | Disutility | Duration (days) | Disutility source                                 | Duration source                                     |
| Alanine aminotransferase increase | -0.050     | 50.5            | Assumption based on TA347 [19]                    | VISION                                              |
| Alopecia                          | -0.045     | 37.2            | Nafees et al, 2008 [52]                           | Assumed based on mean duration of all AEs in VISION |
| Amylase increase                  | -0.050     | 372.9           | Assumed same as ALT increase                      | VISION                                              |
| Anaemia                           | -0.073     | 77.3            | Assumed same as Fatigue                           | VISION                                              |
| Asthenia                          | -0.073     | 59.0            | Assumed same as fatigue                           | VISION                                              |
| Bilirubin increased               | -0.050     | 37.2            | Assumed same as ALT increase                      | Assumed based on mean duration of all AEs in VISION |
| Cardiac failure                   | -0.105     | 62.8            | McMurray et al, 2018 [53]                         | VISION                                              |
| Cough                             | -0.046     | 22.0            | Doyle et al, 2008 [54]                            | VISION                                              |
| Diarrhoea                         | -0.047     | 5.5             | Nafees et al, 2008 [52]                           | VISION                                              |
| Dyspnoea                          | -0.050     | 31.4            | Parcha et al, 2018 [55] (Doyle et al, 2008 [54])  | VISION                                              |
| Fatigue                           | -0.073     | 526.7           | Nafees et al, 2008 [52]                           | VISION                                              |
| Febrile neutropenia               | -0.090     | 7.1             | Nafees et al, 2008 [52]                           | VISION                                              |
| Hyperglycaemia                    | -0.122     | 1.0             | Palmer et al, 2016 [55] (Currie et al, 2006 [56]) | VISION                                              |
| Hypertension                      | -0.030     | 107.0           | Paracha et al, 2018 [55]                          | VISION                                              |
| Hypoalbuminemia                   | -0.050     | 486.6           | Assumed same as white blood cell count decrease   | VISION                                              |
| Hypomagnesaemia                   | -0.003     | 7.0             | CADTH, 2020 [57]                                  | VISION                                              |

|                                      |        |       |                                                 |                                                     |
|--------------------------------------|--------|-------|-------------------------------------------------|-----------------------------------------------------|
| Hypophosphatemia                     | -0.003 | 193.3 | Assumed same as hypomagnesemia                  | VISION                                              |
| Increased Aspartate Aminotransferase | -0.050 | 25.1  | Assumed same as ALT increase                    | VISION                                              |
| Infection                            | -0.050 | 19.8  | Assumption based on TA347 [19]                  | VISION                                              |
| Leukopenia                           | -0.090 | 200.0 | Assumed same as Neutropenia                     | VISION                                              |
| Lipase increase                      | -0.073 | 76.8  | Assumed same as anaemia                         | VISION                                              |
| Lymphocyte count decrease            | -0.050 | 122.0 | Assumed same as white blood cell count decrease | VISION                                              |
| Nausea                               | -0.048 | 7.8   | Nafees et al, 2008 [52]                         | VISION                                              |
| Neuromotor                           | -0.150 | 37.2  | Tabberer et al, 2006 [58]                       | Assumed based on mean duration of all AEs in VISION |
| Neurosensory                         | -0.150 | 37.2  | Tabberer et al, 2006 [58]                       | Assumed based on mean duration of all AEs in VISION |
| Neutropenia                          | -0.090 | 87.0  | Nafees et al, 2008 [52]                         | VISION                                              |
| Neutrophil count decrease            | -0.090 | 33.3  | Assumed same as neutropenia                     | VISION                                              |
| Oedema peripheral/other              | -0.085 | 311.3 | Hagiwara et al, 2018 [59]                       | VISION                                              |
| Pain                                 | -0.069 | 31.0  | Doyle et al, 2008 [54]                          | VISION                                              |
| Platelet count decrease              | -0.050 | 370.0 | Assumed same as white blood cell count decrease | VISION                                              |
| Pleural effusion                     | -0.008 | 246.6 | Assumed same as pneumonia                       | VISION                                              |
| Pneumonitis / pneumonia              | -0.008 | 39.7  | Marti et al, 2013 [60]                          | VISION                                              |
| Pulmonary/Resp. Tract infection      | -0.186 | 61.9  | Hunter et al, 2015 [61]                         | VISION                                              |
| Thrombocytopenia                     | -0.003 | 165.5 | Handorf et al, 2012 [62]                        | VISION                                              |
| Vomiting                             | -0.048 | 16.3  | Nafees et al, 2008 [52]                         | VISION                                              |
| White blood cell count decrease      | -0.050 | 15.5  | Assumption based on TA347 [19]                  | VISION                                              |

**Table 3: Chosen base case curves for each comparison**

| Comparison                                | Treatment                    | OS curve          | PFS curve         |
|-------------------------------------------|------------------------------|-------------------|-------------------|
| <b>MAIC</b>                               |                              |                   |                   |
| Tepotinib vs pembrolizumab + chemotherapy | Tepotinib                    | Log-logistic      | Log-normal        |
|                                           | Pembrolizumab + chemotherapy | Log-logistic      | Log-logistic      |
| Tepotinib vs pembrolizumab monotherapy    | Tepotinib                    | Log-normal        | Log-normal        |
|                                           | Pembrolizumab                | Log-normal        | Generalised gamma |
| Tepotinib vs docetaxel + nintedanib       | Tepotinib                    | Log-normal        | Log-normal        |
|                                           | Docetaxel + nintedanib       | Gamma             | Log-logistic      |
| Tepotinib vs docetaxel                    | Tepotinib                    | Exponential       | Log-normal        |
|                                           | Docetaxel                    | Generalised gamma | Log-logistic      |
| <b>RWE ITC</b>                            |                              |                   |                   |
| Tepotinib vs Immunotherapy ± chemotherapy | Tepotinib                    | Log-logistic      | Log-logistic      |
|                                           | Immunotherapy                | Exponential       | Weibull           |
|                                           | Immunotherapy + chemotherapy | Exponential       | Log-normal        |
|                                           | Tepotinib                    | Log-normal        | Log-normal        |

| Comparison                | Treatment    | OS curve | PFS curve    |
|---------------------------|--------------|----------|--------------|
| Tepotinib vs chemotherapy | Chemotherapy | Weibull  | Log-logistic |

**Table 4: Base-case deterministic pairwise QALY results – real-world data**

| Health state                                  | Tepotinib total | Comparator total | Incremental |
|-----------------------------------------------|-----------------|------------------|-------------|
| <b><i>Vs Immunotherapy</i></b>                |                 |                  |             |
| Progression-free                              | 1.35            | 0.66             | 0.69        |
| Post-progression                              | 0.69            | 0.68             | 0.01        |
| Adverse events                                | -0.02180        | -0.00295         | -0.01885    |
| Total                                         | 2.02            | 1.33             | 0.68        |
| <b><i>Vs Immunotherapy + chemotherapy</i></b> |                 |                  |             |
| Progression-free                              | 1.35            | 0.74             | 0.61        |
| Post-progression                              | 0.69            | 0.70             | -0.01       |
| Adverse events                                | -0.02180        | -0.01553         | -0.00627    |
| Total                                         | 2.02            | 1.42             | 0.60        |
| <b><i>Vs Chemotherapy</i></b>                 |                 |                  |             |
| Progression-free                              | 0.90            | 0.50             | 0.40        |
| Post-progression                              | 0.70            | 0.61             | 0.10        |
| Adverse events                                | -0.02279        | -0.00920         | -0.01359    |
| Total                                         | 1.58            | 1.10             | 0.48        |

**Table 5: Model predicted survival versus observed/weighted trial data**

| <b>Untreated population</b>      |                       |                                                  |              |                                     |              |                                   |              |                      |              |                                                      |              |                      |              |                                     |              |
|----------------------------------|-----------------------|--------------------------------------------------|--------------|-------------------------------------|--------------|-----------------------------------|--------------|----------------------|--------------|------------------------------------------------------|--------------|----------------------|--------------|-------------------------------------|--------------|
| <b>Survival</b>                  |                       | <b>Tepotinib vs pembrolizumab + chemotherapy</b> |              |                                     |              | <b>Tepotinib vs pembrolizumab</b> |              |                      |              | <b>Tepotinib versus immunotherapy ± chemotherapy</b> |              |                      |              |                                     |              |
|                                  |                       | <b>Tepotinib</b>                                 |              | <b>Pembrolizumab + chemotherapy</b> |              | <b>Tepotinib</b>                  |              | <b>Pembrolizumab</b> |              | <b>Tepotinib</b>                                     |              | <b>Immunotherapy</b> |              | <b>Immunotherapy + chemotherapy</b> |              |
|                                  |                       | <b>Observed<sup>a</sup></b>                      | <b>Model</b> | <b>Observed</b>                     | <b>Model</b> | <b>Observed<sup>a</sup></b>       | <b>Model</b> | <b>Observed</b>      | <b>Model</b> | <b>Observed</b>                                      | <b>Model</b> | <b>Observed</b>      | <b>Model</b> | <b>Observed</b>                     | <b>Model</b> |
| <b>Overall survival</b>          | Median (months)       | 32.7                                             | 37.0         | 22.3                                | 21.6         | 29.8                              | 34.7         | 26.0                 | 25.5         | 21.3                                                 | 20.5         | 19.8                 | 17.7         | 19.3                                | 19.1         |
|                                  | Lifetime mean (years) | -                                                | 5.9          | -                                   | 3.7          | -                                 | 6.3          | -                    | 5.2          | -                                                    | 3.6          | -                    | 2.1          | -                                   | 2.3          |
|                                  | 1 year                | 80.2%                                            | 81.2%        | 70.8%                               | 70.0%        | 74.6%                             | 75.9%        | 70.0%                | 68.7%        | 65.1%                                                | 67.0%        | 68.5%                | 62.7%        | 73.0%                               | 64.8%        |
|                                  | 2 years               | 60.8%                                            | 63.8%        | 46.2%                               | 46.7%        | 57.0%                             | 59.8%        | 52.5%                | 51.8%        | 44.4%                                                | 45.2%        | 25.8%                | 39.3%        | 34.6%                               | 42.0%        |
|                                  | 3 years               | 44.4%                                            | 51.1%        | 32.6%                               | 33.1%        | 43.6%                             | 49.3%        | 44.4%                | 41.5%        | 32.0%                                                | 32.7%        | 22.1%                | 24.6%        | 15.3%                               | 27.2%        |
|                                  | 4 years               | 44.2%                                            | 41.8%        | -                                   | 24.8%        | 43.5%                             | 41.8%        | 36.4%                | 34.5%        | 30.3%                                                | 25.1%        | 7.5%                 | 15.4%        | -                                   | 17.7%        |
| <b>Progression-free survival</b> | Median (months)       | 15.8                                             | 20.7         | 9.2                                 | 9.7          | 13.5                              | 17.7         | 8.3                  | 8.5          | 8.7                                                  | 10.8         | 3.6                  | 5.3          | 6.7                                 | 6.9          |
|                                  | Lifetime mean (years) | -                                                | 4.5          | -                                   | 1.7          | -                                 | 4.5          | -                    | 3.0          | -                                                    | 2.2          | -                    | 1.0          | -                                   | 1.1          |
|                                  | 1 year                | 62.9%                                            | 64.1%        | 40.3%                               | 42.1%        | 57.1%                             | 59.1%        | 41.6%                | 42.2%        | 43.2%                                                | 47.1%        | 35.7%                | 30.1%        | 37.9%                               | 31.6%        |
|                                  | 2 years               | 47.2%                                            | 46.6%        | 22.4%                               | 20.1%        | 43.1%                             | 43.0%        | 28.3%                | 27.4%        | 31.0%                                                | 26.8%        | 14.9%                | 14.0%        | 15.9%                               | 13.8%        |
|                                  | 3 years               | 42.0%                                            | 36.4%        | 12.1%                               | 11.9%        | 40.9%                             | 34.0%        | 23.1%                | 20.6%        | 23.5%                                                | 17.8%        | -                    | 7.3%         | 4.0%                                | 7.4%         |
|                                  | 4 years               | 42.0%                                            | 29.7%        | -                                   | 8.0%         | 40.9%                             | 28.1%        | 16.6%                | 16.6%        | 23.5%                                                | 13.0%        | -                    | 4.0%         | -                                   | 4.5%         |

| <b>Previously treated population</b> |                       |                                            |              |                               |              |                               |              |                  |              |                                  |              |                     |              |
|--------------------------------------|-----------------------|--------------------------------------------|--------------|-------------------------------|--------------|-------------------------------|--------------|------------------|--------------|----------------------------------|--------------|---------------------|--------------|
| <b>Survival</b>                      |                       | <b>Tepotinib vs docetaxel + nintedanib</b> |              |                               |              | <b>Tepotinib vs docetaxel</b> |              |                  |              | <b>Tepotinib vs chemotherapy</b> |              |                     |              |
|                                      |                       | <b>Tepotinib</b>                           |              | <b>Docetaxel + nintedanib</b> |              | <b>Tepotinib</b>              |              | <b>Docetaxel</b> |              | <b>Tepotinib</b>                 |              | <b>Chemotherapy</b> |              |
|                                      |                       | <b>Observed<sup>a</sup></b>                | <b>Model</b> | <b>Observed</b>               | <b>Model</b> | <b>Observed<sup>a</sup></b>   | <b>Model</b> | <b>Observed</b>  | <b>Model</b> | <b>Observed</b>                  | <b>Model</b> | <b>Observed</b>     | <b>Model</b> |
| Overall survival                     | Median (months)       | 18.8                                       | 18.2         | 12.9                          | 13.1         | 23.7                          | 21.8         | 9.3              | 9.0          | 19.3                             | 18.6         | 11.0                | 14.7         |
|                                      | Lifetime mean (years) | -                                          | 2.9          | -                             | 1.5          | -                             | 2.6          | -                | 1.2          | -                                | 2.7          | -                   | 1.8          |
|                                      | 1 year                | 62.4%                                      | 64.4%        | 52.6%                         | 54.1%        | 66.8%                         | 68.4%        | 37.6%            | 39.7%        | 67.8%                            | 66.4%        | 45.7%               | 57.6%        |
|                                      | 2 years               | 43.9%                                      | 40.9%        | 25.5%                         | 25.5%        | 49.6%                         | 46.9%        | 17.7%            | 17.3%        | 38.4%                            | 40.6%        | 28.7%               | 32.2%        |
|                                      | 3 years               | 29.7%                                      | 28.1%        | -                             | 11.6%        | 31.6%                         | 32.1%        | -                | 8.7%         | 26.5%                            | 26.7%        | 22.8%               | 17.9%        |
|                                      | 4 years               | 19.0%                                      | 20.4%        | -                             | 5.2%         | 20.8%                         | 22.0%        | -                | 4.7%         | 18.5%                            | 18.5%        | 22.8%               | 9.8%         |
| Progression-free survival            | Median (months)       | 8.3                                        | 8.5          | 4.1                           | 3.5          | 11.0                          | 9.7          | 3.1              | 3.2          | 8.3                              | 9.2          | 4.8                 | 5.1          |
|                                      | Lifetime mean (years) | -                                          | 1.3          | -                             | 0.5          | -                             | 1.6          | -                | 0.5          | -                                | 1.4          | -                   | 0.7          |
|                                      | 1 year                | 38.5%                                      | 38.3%        | 8.1%                          | 7.8%         | 41.2%                         | 43.5%        | 7.8%             | 9.1%         | 36.2%                            | 40.5%        | 20.3%               | 21.9%        |
|                                      | 2 years               | 18.8%                                      | 17.1%        | -                             | 2.0%         | 24.6%                         | 23.2%        | 1.5%             | 2.8%         | 19.2%                            | 18.3%        | 5.7%                | 7.1%         |
|                                      | 3 years               | 17.9%                                      | 9.2%         | -                             | 0.9%         | 23.5%                         | 14.4%        | -                | 1.4%         | 14.1%                            | 9.8%         | 5.7%                | 2.8%         |
|                                      | 4 years               | 17.9%                                      | 5.5%         | -                             | 0.5%         | 23.5%                         | 9.7%         | -                | 0.8%         | 14.1%                            | 5.9%         | -                   | 1.3%         |

<sup>a</sup> Observed data from VISION has been re-weighted to match the comparator population









**Table 6: Scenario analysis – incremental life-years and QALYs – versus published clinical trials**

| Scenario              |              | Vs pembrolizumab + chemotherapy |             | Vs pembrolizumab |             | Vs docetaxel + nintedanib |             | Vs docetaxel |             | Vs Immunotherapy |             | Vs Immunotherapy + chemotherapy |             | Vs Chemotherapy |             |
|-----------------------|--------------|---------------------------------|-------------|------------------|-------------|---------------------------|-------------|--------------|-------------|------------------|-------------|---------------------------------|-------------|-----------------|-------------|
|                       |              | Inc. LYs                        | Inc. QALYs  | Inc. LYs         | Inc. QALYs  | Inc. LYs                  | Inc. QALYs  | Inc. LYs     | Inc. QALYs  | Inc. LYs         | Inc. QALYs  | Inc. LYs                        | Inc. QALYs  | Inc. LYs        | Inc. QALYs  |
| Tepotinib OS          | Exponential  | 0.95                            | 0.69        | -1.08            | -0.26       | <b>0.91</b>               | <b>0.54</b> | <b>1.40</b>  | <b>0.85</b> | <b>0.55</b>      | <b>0.33</b> | <b>0.38</b>                     | <b>0.24</b> | <b>0.60</b>     | <b>0.35</b> |
|                       | Gen Gamma    | <b>1.80</b>                     | <b>1.01</b> | <b>0.62</b>      | <b>0.39</b> | 2.24                      | 1.04        | 2.25         | 1.18        | <b>1.27</b>      | <b>0.63</b> | <b>1.10</b>                     | <b>0.55</b> | <b>0.84</b>     | <b>0.45</b> |
|                       | Gompertz     | <b>2.07</b>                     | <b>1.10</b> | 2.08             | 0.88        | <b>0.87</b>               | <b>0.52</b> | 1.18         | 0.75        | 1.80             | 0.84        | <b>1.64</b>                     | <b>0.75</b> | <b>0.50</b>     | <b>0.31</b> |
|                       | Log-logistic | <b>2.28</b>                     | <b>1.17</b> | <b>0.67</b>      | <b>0.38</b> | <b>1.70</b>               | <b>0.83</b> | 2.43         | 1.24        | <b>1.42</b>      | <b>0.68</b> | <b>1.25</b>                     | <b>0.60</b> | <b>0.99</b>     | <b>0.50</b> |
|                       | Log-normal   | <b>2.85</b>                     | <b>1.38</b> | <b>1.11</b>      | <b>0.56</b> | <b>1.44</b>               | <b>0.75</b> | 2.17         | 1.15        | <b>1.60</b>      | <b>0.77</b> | <b>1.44</b>                     | <b>0.68</b> | <b>0.91</b>     | <b>0.48</b> |
|                       | Weibull      | 0.67                            | 0.57        | -0.95            | -0.20       | <b>0.79</b>               | <b>0.49</b> | <b>1.26</b>  | <b>0.79</b> | <b>0.54</b>      | <b>0.33</b> | <b>0.38</b>                     | <b>0.24</b> | <b>0.42</b>     | <b>0.27</b> |
|                       | Gamma        | 0.67                            | 0.57        | -1.07            | -0.25       | <b>0.79</b>               | <b>0.49</b> | <b>1.28</b>  | <b>0.80</b> | <b>0.50</b>      | <b>0.31</b> | <b>0.33</b>                     | <b>0.22</b> | <b>0.43</b>     | <b>0.27</b> |
| Tepotinib PFS         | Exponential  | 2.28                            | 1.09        | 1.11             | 0.47        | <b>1.44</b>               | <b>0.74</b> | <b>1.40</b>  | <b>0.84</b> | <b>1.42</b>      | <b>0.66</b> | <b>1.25</b>                     | <b>0.57</b> | 0.91            | 0.47        |
|                       | Gen Gamma    | 2.28                            | 1.20        | 1.11             | 0.61        | <b>1.44</b>               | <b>0.77</b> | 1.40         | 0.87        | <b>1.42</b>      | <b>0.70</b> | <b>1.25</b>                     | <b>0.62</b> | <b>0.91</b>     | <b>0.50</b> |
|                       | Gompertz     | 2.28                            | 1.21        | 1.11             | 0.62        | <b>1.44</b>               | <b>0.77</b> | 1.40         | 0.87        | 1.42             | 0.72        | 1.25                            | 0.64        | 0.91            | 0.50        |
|                       | Log-logistic | <b>2.28</b>                     | <b>1.16</b> | <b>1.11</b>      | <b>0.55</b> | <b>1.44</b>               | <b>0.75</b> | <b>1.40</b>  | <b>0.85</b> | <b>1.42</b>      | <b>0.68</b> | <b>1.25</b>                     | <b>0.60</b> | <b>0.91</b>     | <b>0.48</b> |
|                       | Log-normal   | <b>2.28</b>                     | <b>1.17</b> | <b>1.11</b>      | <b>0.56</b> | <b>1.44</b>               | <b>0.75</b> | <b>1.40</b>  | <b>0.85</b> | <b>1.42</b>      | <b>0.69</b> | <b>1.25</b>                     | <b>0.60</b> | <b>0.91</b>     | <b>0.48</b> |
|                       | Weibull      | 2.28                            | 1.11        | 1.11             | 0.51        | <b>1.44</b>               | <b>0.74</b> | <b>1.40</b>  | <b>0.84</b> | <b>1.42</b>      | <b>0.66</b> | <b>1.25</b>                     | <b>0.58</b> | 0.91            | 0.47        |
|                       | Gamma        | 2.28                            | 1.10        | 1.11             | 0.50        | <b>1.44</b>               | <b>0.74</b> | <b>1.40</b>  | <b>0.83</b> | <b>1.42</b>      | <b>0.66</b> | <b>1.25</b>                     | <b>0.57</b> | 0.91            | 0.47        |
| Comparator OS         | Exponential  | <b>3.28</b>                     | <b>1.55</b> | <b>2.59</b>      | <b>1.05</b> | <b>1.39</b>               | <b>0.73</b> | <b>1.50</b>  | <b>0.90</b> | <b>1.42</b>      | <b>0.68</b> | <b>1.25</b>                     | <b>0.60</b> | <b>0.88</b>     | <b>0.46</b> |
|                       | Gen Gamma    | <b>3.44</b>                     | <b>1.63</b> | <b>1.57</b>      | <b>0.71</b> | <b>1.33</b>               | <b>0.70</b> | <b>1.40</b>  | <b>0.85</b> | <b>1.65</b>      | <b>0.80</b> | <b>1.30</b>                     | <b>0.63</b> | 0.23            | 0.20        |
|                       | Gompertz     | 3.65                            | 1.74        | <b>1.20</b>      | <b>0.59</b> | <b>1.46</b>               | <b>0.76</b> | <b>1.51</b>  | <b>0.91</b> | <b>1.69</b>      | <b>0.82</b> | <b>1.65</b>                     | <b>0.80</b> | -0.46           | -0.07       |
|                       | Log-logistic | <b>2.28</b>                     | <b>1.17</b> | <b>1.10</b>      | <b>0.55</b> | <b>0.92</b>               | <b>0.53</b> | <b>1.12</b>  | <b>0.73</b> | <b>0.82</b>      | <b>0.43</b> | <b>1.42</b>                     | <b>0.70</b> | <b>0.57</b>     | <b>0.36</b> |
|                       | Log-normal   | <b>2.13</b>                     | <b>1.09</b> | <b>1.11</b>      | <b>0.56</b> | <b>1.09</b>               | <b>0.59</b> | <b>1.24</b>  | <b>0.77</b> | <b>0.75</b>      | <b>0.39</b> | <b>1.43</b>                     | <b>0.69</b> | <b>0.57</b>     | <b>0.34</b> |
|                       | Weibull      | <b>3.50</b>                     | <b>1.66</b> | <b>2.27</b>      | <b>0.94</b> | <b>1.45</b>               | <b>0.75</b> | <b>1.55</b>  | <b>0.93</b> | <b>1.64</b>      | <b>0.79</b> | <b>1.69</b>                     | <b>0.82</b> | <b>0.91</b>     | <b>0.48</b> |
|                       | Gamma        | <b>3.44</b>                     | <b>1.63</b> | <b>2.40</b>      | <b>0.98</b> | <b>1.44</b>               | <b>0.75</b> | <b>1.55</b>  | <b>0.93</b> | <b>1.58</b>      | <b>0.76</b> | <b>1.69</b>                     | <b>0.82</b> | <b>0.95</b>     | <b>0.50</b> |
| Comparator PFS        | Exponential  | <b>2.28</b>                     | <b>1.18</b> | 1.11             | 0.60        | <b>1.44</b>               | <b>0.75</b> | <b>1.40</b>  | <b>0.86</b> | <b>1.42</b>      | <b>0.69</b> | <b>1.25</b>                     | <b>0.60</b> | <b>0.91</b>     | <b>0.48</b> |
|                       | Gen Gamma    | <b>2.28</b>                     | <b>1.17</b> | <b>1.11</b>      | <b>0.56</b> | <b>1.44</b>               | <b>0.75</b> | <b>1.40</b>  | <b>0.85</b> | <b>1.42</b>      | <b>0.68</b> | <b>1.25</b>                     | <b>0.60</b> | <b>0.91</b>     | <b>0.48</b> |
|                       | Gompertz     | <b>2.28</b>                     | <b>1.18</b> | 1.11             | 0.53        | <b>1.44</b>               | <b>0.76</b> | <b>1.40</b>  | <b>0.86</b> | 1.42             | 0.67        | <b>1.25</b>                     | <b>0.60</b> | <b>0.91</b>     | <b>0.47</b> |
|                       | Log-logistic | <b>2.28</b>                     | <b>1.17</b> | <b>1.11</b>      | <b>0.58</b> | <b>1.44</b>               | <b>0.75</b> | <b>1.40</b>  | <b>0.85</b> | <b>1.42</b>      | <b>0.67</b> | <b>1.25</b>                     | <b>0.59</b> | <b>0.91</b>     | <b>0.48</b> |
|                       | Log-normal   | <b>2.28</b>                     | <b>1.17</b> | <b>1.11</b>      | <b>0.58</b> | <b>1.44</b>               | <b>0.75</b> | <b>1.40</b>  | <b>0.86</b> | <b>1.42</b>      | <b>0.67</b> | <b>1.25</b>                     | <b>0.60</b> | <b>0.91</b>     | <b>0.47</b> |
|                       | Weibull      | 2.28                            | 1.18        | 1.11             | 0.60        | <b>1.44</b>               | <b>0.75</b> | <b>1.40</b>  | <b>0.86</b> | <b>1.42</b>      | <b>0.68</b> | <b>1.25</b>                     | <b>0.60</b> | <b>0.91</b>     | <b>0.48</b> |
|                       | Gamma        | 2.28                            | 1.18        | 1.11             | 0.60        | <b>1.44</b>               | <b>0.75</b> | <b>1.40</b>  | <b>0.86</b> | <b>1.42</b>      | <b>0.69</b> | <b>1.25</b>                     | <b>0.60</b> | <b>0.91</b>     | <b>0.48</b> |
| Utility source: KN024 |              | 2.28                            | 1.34        | 1.11             | 0.63        | 1.44                      | 0.92        | 1.40         | 1.03        | 1.42             | 0.81        | 1.25                            | 0.71        | 0.91            | 0.58        |

**Key:** Inc, incremental; LYs, life-years; OS, overall survival; PFS, progression-free survival; QALYs, quality-adjusted life-years. ***Italic underlined*** = base case; **Bold** = plausible curves

**Fig. 4: External validation of OS and PFS – versus published clinical trials**

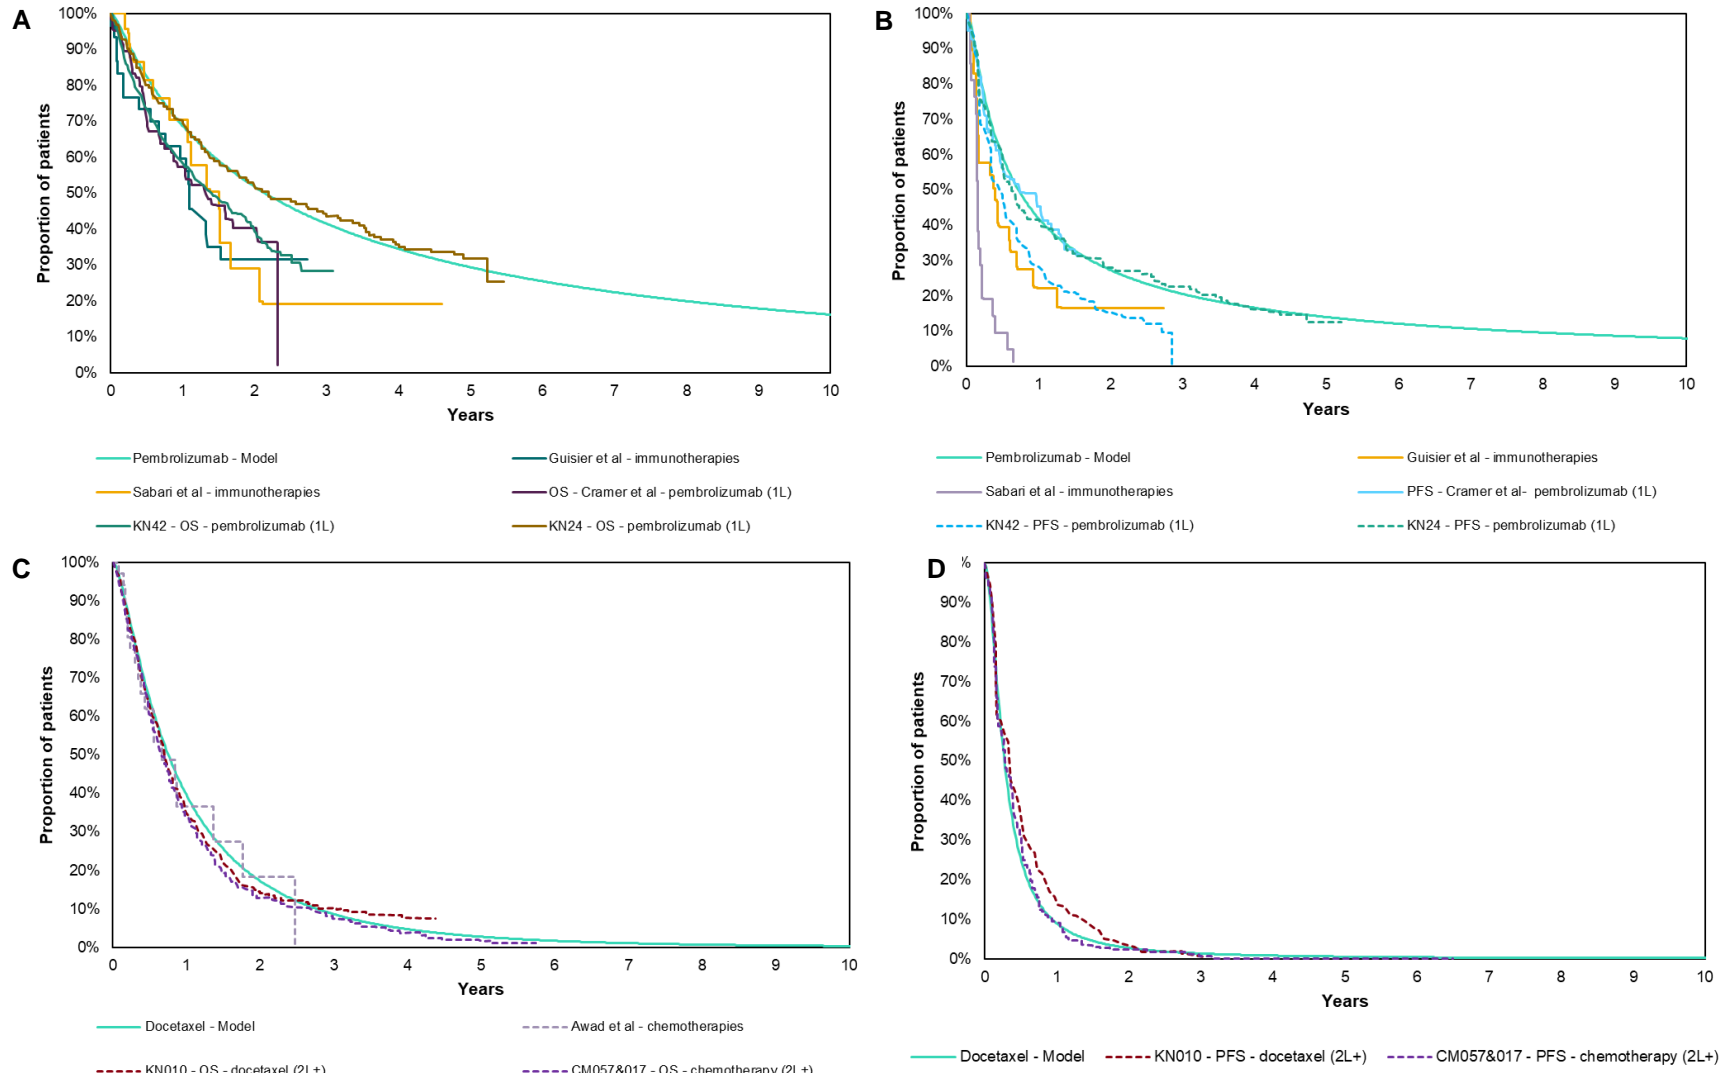

**A: Pembrolizumab OS. B: Pembrolizumab PFS. C: Docetaxel OS. D: Docetaxel PFS**
